# Supplementary material
Source: PubMed Central journal article supplement (PMC4839178)

SUPPLEMENTARY DATA

**Supplementary Table.** Adjusted Hazard Ratios (95% Confidence Interval) for Incident CVD and CHD Events Among Subjects With Diabetes, According to Being at Individual and Composite Risk Factor Target, Stratified by Gender and Ethnicity

|                                   | Individual Risk Factor at Target   |                                                             |                                                     | Number of Risk Factors at Target                          |                                                           |                                                              |
|-----------------------------------|------------------------------------|-------------------------------------------------------------|-----------------------------------------------------|-----------------------------------------------------------|-----------------------------------------------------------|--------------------------------------------------------------|
|                                   | BP < 130/80 mmHg vs. ≥ 130/80 mmHg | LDL-C < 2.6 mmol/l [100 mg/dl] vs. ≥ 2.6 mmol/l [100 mg/dl] | HbA1c < 53.0 mmol/mol [7%] vs. ≥ 53.0 mmol/mol [7%] | Any one (BP, LDL-C or HbA1c) at Target vs. None at Target | Any two (BP, LDL-C or HbA1c) at Target vs. None at Target | All three (BP, LDL-C and HbA1c) at Target vs. None at Target |
| <b>CVD</b>                        |                                    |                                                             |                                                     |                                                           |                                                           |                                                              |
| <b>Gender</b>                     |                                    |                                                             |                                                     |                                                           |                                                           |                                                              |
| <b>Male, n=870</b>                | 0.99 (0.78-1.25)                   | 0.55 (0.41-0.72) §                                          | 0.66 (0.51-0.84) ‡                                  | 0.68 (0.52-0.91) †                                        | 0.53 (0.38-0.74) ‡                                        | 0.34 (0.20-0.60) ‡                                           |
| <b>Female, n=1,148</b>            | 0.70 (0.55-0.89) †                 | 0.85 (0.63-1.13)                                            | 0.59 (0.45-0.78) ‡                                  | 0.60 (0.46-0.77) §                                        | 0.47 (0.34-0.65) §                                        | 0.47 (0.25-0.89) *                                           |
| <b>p-Interaction</b>              | 0.13                               | 0.03                                                        | 0.45                                                | 0.74                                                      |                                                           |                                                              |
| <b>Race</b>                       |                                    |                                                             |                                                     |                                                           |                                                           |                                                              |
| <b>African Americans, n=1,104</b> | 0.69 (0.54-0.88) †                 | 0.71 (0.53-0.94) *                                          | 0.68 (0.52-0.89) †                                  | 0.55 (0.42-0.71) §                                        | 0.55 (0.40-0.76) ‡                                        | 0.23 (0.09-0.55) †                                           |
| <b>All Other Races, n=914</b>     | 0.97 (0.77-1.23)                   | 0.63 (0.47-0.84) †                                          | 0.60 (0.47-0.77) §                                  | 0.76 (0.57-1.00)                                          | 0.44 (0.32-0.63) §                                        | 0.49 (0.30-0.82) †                                           |
| <b>p-Interaction</b>              | 0.09                               | 0.57                                                        | 0.39                                                | 0.04                                                      |                                                           |                                                              |
| <b>CHD</b>                        |                                    |                                                             |                                                     |                                                           |                                                           |                                                              |
| <b>Gender</b>                     |                                    |                                                             |                                                     |                                                           |                                                           |                                                              |
| <b>Male, n=870</b>                | 0.97 (0.72-1.30)                   | 0.53 (0.37-0.75) ‡                                          | 0.72 (0.54-0.97) *                                  | 0.77 (0.55-1.09)                                          | 0.55 (0.36-0.83) †                                        | 0.39 (0.19-0.78) †                                           |
| <b>Female, n=1,148</b>            | 0.67 (0.49-0.92) *                 | 0.70 (0.46-1.07)                                            | 0.56 (0.38-0.81) †                                  | 0.45 (0.32-0.64) §                                        | 0.36 (0.23-0.57) §                                        | 0.49 (0.22-1.10)                                             |
| <b>p-Interaction</b>              | 0.33                               | 0.49                                                        | 0.24                                                | 0.21                                                      |                                                           |                                                              |
| <b>Race</b>                       |                                    |                                                             |                                                     |                                                           |                                                           |                                                              |
| <b>African Americans, n=1,104</b> | 0.61 (0.42-0.87) †                 | 0.74 (0.49-1.12)                                            | 0.59 (0.40-0.88) †                                  | 0.50 (0.34-0.71) ‡                                        | 0.45 (0.28-0.72) ‡                                        | 0.30 (0.09-0.96) *                                           |
| <b>All Other Races, n=914</b>     | 0.95 (0.72-1.25)                   | 0.50 (0.35-0.71) §                                          | 0.68 (0.51-0.90) †                                  | 0.66 (0.48-0.91) *                                        | 0.43 (0.29-0.64) §                                        | 0.45 (0.24-0.81) †                                           |
| <b>p-Interaction</b>              | 0.12                               | 0.26                                                        | 0.77                                                | 0.64                                                      |                                                           |                                                              |

Adjusted for age, gender, ethnicity, smoking status, HDL-C, BMI, family history of pre-mature CVD, hypertension medication, anti-diabetic medication and lipid-lowering medication (also include LDL-C and HbA1c for BP analysis; systolic/diastolic BP and HbA1c for LDL-C analysis; LDL-C and systolic/diastolic BP for HbA1c analysis).

\*p < .05, † p < .01, ‡ p < .001, § p < .0001.

SUPPLEMENTARY DATA

**Supplementary Figure.** Flow-chart of sample selection from ARIC, MESA and JHS \* Key risk factors include age, gender, race, SBP, DBP, LDL, HDL, HbA1c and BMI

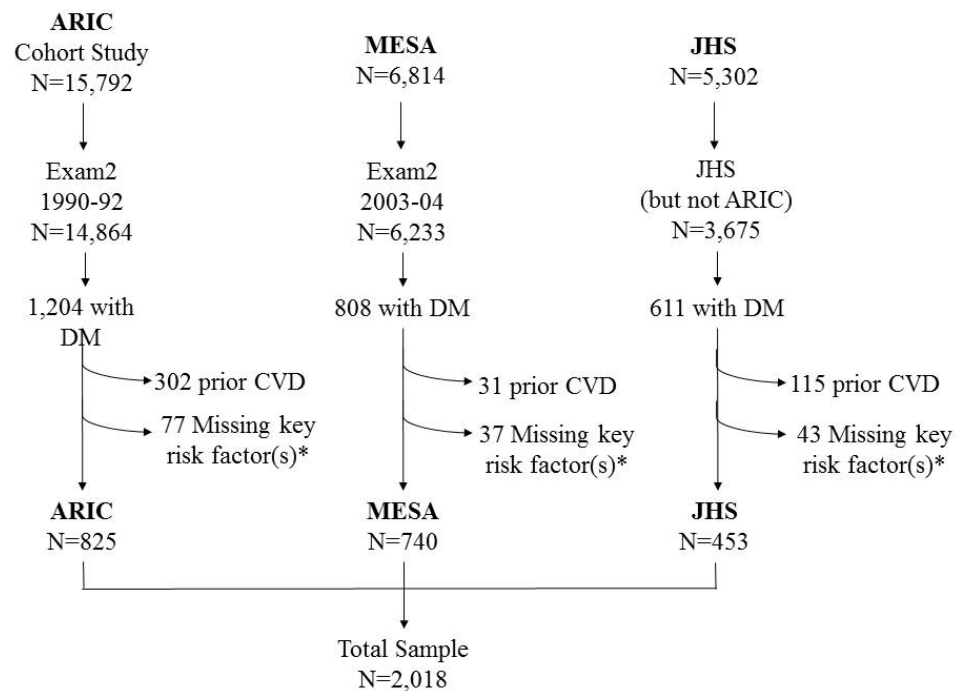

Supplement: supp_dc15-2439v152439_DC152439SupplementaryData.pdf [file supp_dc15-2439v152439_DC152439SupplementaryData.pdf]
